# Supplementary material
Source: PubMed Central journal article supplement (PMC9536443)
Supplement: glac091_suppl_supplementary_material.pdf [file glac091_suppl_supplementary_material.pdf]

**eFig. 1**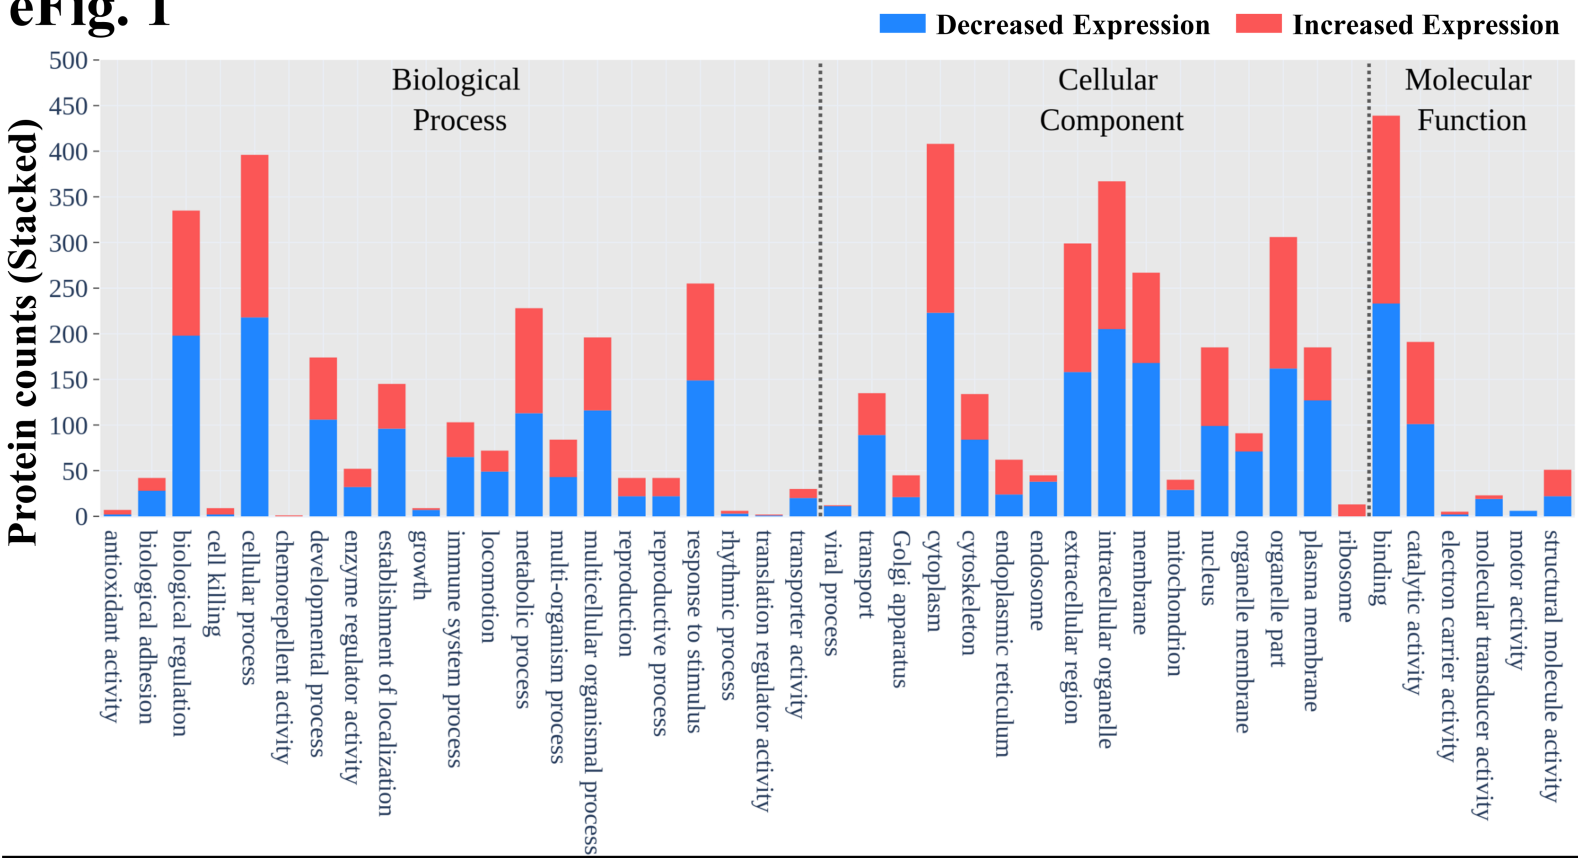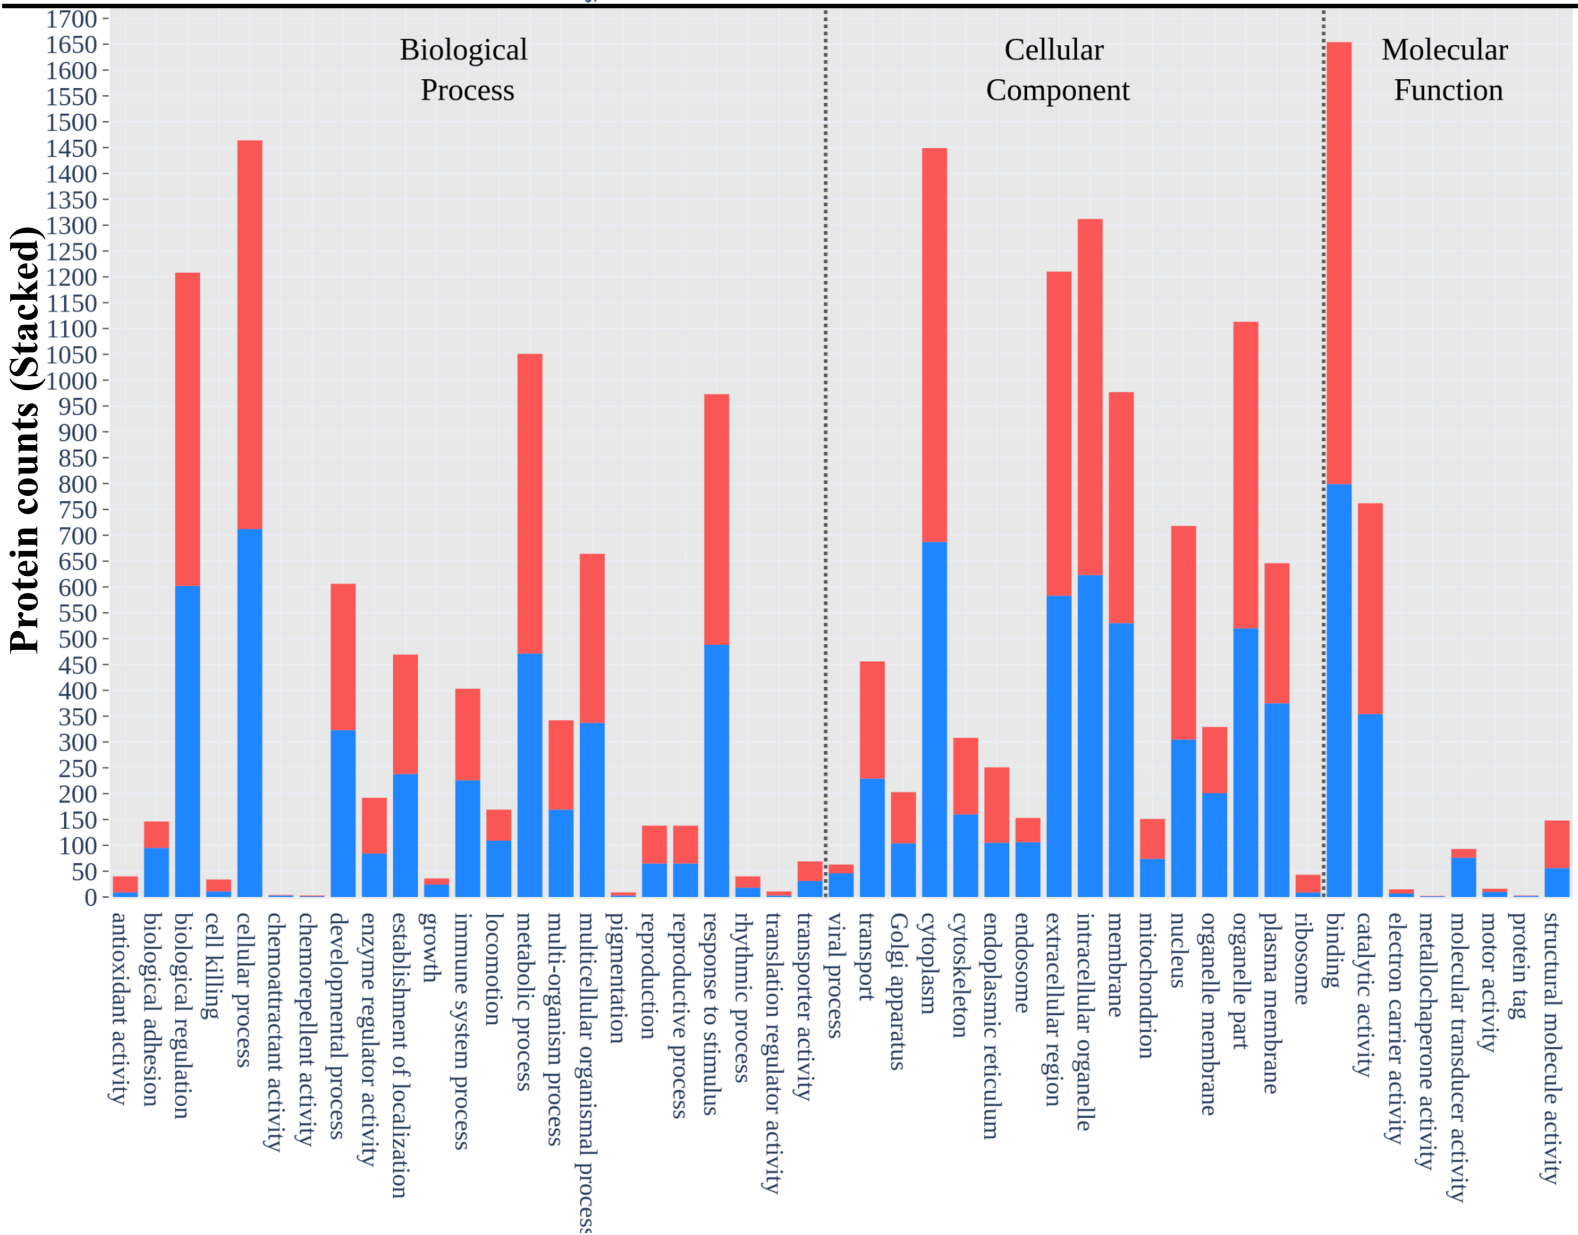







eTable 1, continued

| Uniprot # | Uniprot ID | A1    | A2    | A3    | A4    | A5    | A6    | E1   | E2    | E3   | E4   | E5   | E6   | E7    | E8    | E9    | E10   | t-test  | Significance |
|-----------|------------|-------|-------|-------|-------|-------|-------|------|-------|------|------|------|------|-------|-------|-------|-------|---------|--------------|
| P54652    | HSP72      | -0.72 | 0.70  | 0.06  | -0.06 | 1.66  | -0.54 | 0.76 | 2.48  | 1.61 | 2.06 | 1.28 | 2.39 | 1.42  | 1.24  | 2.54  | 2.43  | 0.0007  | **           |
| P20061    | TCO1       | 0.67  | -0.34 | 0.34  | -3.40 | 0.90  | -0.81 | 2.18 | 2.12  | 2.16 | 2.96 | 2.63 | 1.56 | 1.06  | 0.03  | 0.14  | 0.48  | 0.0093  | *            |
| O43866    | CD5L       | -1.13 | -1.35 | -0.09 | 1.78  | 0.09  | 1.68  | 0.75 | 1.71  | 1.97 | 3.20 | 1.00 | 4.67 | 3.74  | 4.47  | 0.78  | 0.92  | 0.014   | *            |
| Q9H4B7    | TBB1       | 1.48  | -2.35 | -0.65 | 0.65  | 1.85  | -9.17 | 2.40 | 0.53  | 2.58 | 3.01 | 1.74 | 1.48 | 1.50  | 2.23  | 0.93  | 1.96  | 0.028   | *            |
| P48595    | SPB10      | -1.05 | -0.65 | 0.65  | -1.97 | 1.06  | 1.14  | 1.04 | 1.69  | 1.41 | 2.67 | 2.02 | 2.36 | 0.92  | 1.44  | 2.39  | 2.66  | 0.00092 | ***          |
| Q5TD94    | RSH4A      | -1.29 | 0.06  | 0.25  | -0.42 | 1.12  | -0.06 | 1.42 | 1.72  | 1.78 | 2.21 | 1.35 | 1.97 | 2.26  | 2.49  | 1.15  | 2.71  | <0.0001 | ****         |
| P00966    | ASSY       | -1.07 | -0.47 | -0.29 | 0.29  | 1.20  | 0.42  | 3.14 | 0.20  | 2.35 | 2.50 | 0.86 | 1.85 | 1.28  | 2.02  | 1.73  | 1.92  | 0.00098 | ***          |
| Q02878    | RL6        | 2.15  | 0.97  | -1.14 | -0.09 | 0.09  | -1.38 | 1.95 | 0.38  | 2.26 | 1.86 | 0.25 | 2.09 | 1.93  | 2.99  | 0.76  | 1.64  | 0.015   | *            |
| Q13247    | SRSF6      | 2.19  | -0.97 | 0.67  | 0.14  | -0.14 | -0.48 | 2.56 | 1.40  | 2.12 | 1.70 | 0.70 | 1.58 | 2.10  | 2.37  | -0.60 | 2.25  | 0.019   | *            |
| Q14894    | CRYM       | -0.61 | -1.34 | 0.18  | -0.18 | 0.92  | 1.30  | 3.17 | -0.77 | 2.87 | 3.12 | 1.38 | 2.14 | 1.83  | 1.93  | 1.91  | 1.61  | 0.0047  | **           |
| P19012    | K1C15      | -0.80 | 0.80  | -1.46 | 0.99  | 1.12  | -1.36 | 3.83 | 1.11  | 3.02 | 3.28 | 1.08 | 2.00 | 1.23  | 2.76  | 0.23  | 1.86  | 0.0032  | **           |
| P29508    | SPB3       | -0.96 | -1.36 | 0.96  | -1.67 | 2.16  | 1.52  | 0.47 | 2.14  | 1.64 | 2.84 | 1.73 | 2.33 | 1.58  | 1.51  | 3.10  | 2.82  | 0.007   | **           |
| P36578    | RL4        | 2.43  | 0.33  | -0.07 | -0.27 | 0.07  | -1.11 | 2.04 | 0.84  | 2.42 | 2.18 | 0.50 | 1.94 | 1.54  | 3.30  | 0.92  | 1.95  | 0.0089  | **           |
| P02743    | SAMP       | 0.05  | -1.54 | -0.38 | 1.13  | -0.05 | 0.68  | 1.03 | 2.25  | 1.76 | 1.43 | 2.55 | 2.98 | 3.38  | 2.13  | -1.03 | 0.73  | 0.011   | *            |
| P59665    | DEF1       | 0.76  | -1.50 | 1.17  | 0.47  | -2.62 | -0.47 | 4.79 | 1.21  | 2.79 | 2.10 | 4.44 | 0.97 | 1.89  | -0.70 | 2.80  | -0.12 | 0.015   | *            |
| P80723    | BASP1      | 0.52  | 2.27  | -0.41 | -0.22 | 0.22  | -0.65 | 1.95 | 3.72  | 2.71 | 2.87 | 2.05 | 1.93 | -0.72 | 0.96  | 1.44  | 2.50  | 0.016   | *            |
| Q96BQ1    | FAM3D      | 0.79  | 0.28  | -0.53 | -0.91 | 1.60  | -0.28 | 2.43 | 2.73  | 3.03 | 3.08 | 2.81 | 1.49 | 1.60  | 0.91  | 1.07  | 0.71  | 0.0019  | **           |
| Q8N142    | PURA1      | -1.20 | 1.30  | -5.21 | -2.40 | 1.73  | 1.20  | 1.11 | 0.44  | 1.26 | 2.62 | 1.02 | 1.94 | 2.25  | 2.68  | 2.45  | 2.08  | 0.013   | *            |
| P05090    | APOD       | -0.21 | -0.23 | -0.02 | 2.02  | 0.02  | 0.48  | 1.43 | 1.20  | 1.90 | 2.77 | 2.14 | 3.71 | 3.20  | 2.47  | 1.06  | 1.11  | 0.0021  | **           |
| Q92743    | HTRA1      | 1.77  | 0.10  | -0.10 | -4.31 | 0.35  | -1.15 | 2.43 | 2.30  | 2.69 | 2.80 | 3.05 | 1.74 | 0.88  | 0.27  | -0.40 | 0.73  | 0.016   | *            |
| P02647    | APOA1      | -0.13 | -1.03 | -0.52 | 1.73  | 0.13  | 0.92  | 2.03 | 0.59  | 2.29 | 2.47 | 1.66 | 3.84 | 3.17  | 2.04  | -0.91 | 1.85  | 0.016   | *            |
| P49913    | CAMP       | 0.91  | -0.83 | 0.83  | 2.32  | -3.27 | -1.10 | 4.40 | 1.82  | 2.09 | 2.26 | 4.45 | 2.02 | 2.11  | 0.08  | 2.62  | -0.24 | 0.017   | *            |
| P06702    | S10A9      | 1.22  | 1.31  | 0.46  | -0.46 | -2.20 | -0.88 | 4.05 | 2.57  | 2.86 | 2.20 | 3.84 | 1.68 | 0.75  | -0.73 | 2.03  | 1.01  | 0.012   | *            |
| P05787    | K2C8       | 0.95  | -0.48 | -1.14 | 0.48  | 0.92  | -0.87 | 3.75 | 0.94  | 3.20 | 3.56 | 1.29 | 2.22 | 2.01  | 2.88  | -0.26 | 1.76  | 0.0028  | **           |
| O43852    | CALU       | -0.22 | 1.39  | -2.37 | -0.30 | 1.46  | 0.22  | 2.06 | 2.34  | 2.36 | 3.73 | 2.22 | 2.11 | 1.98  | 2.71  | 1.05  | 1.57  | 0.00093 | ***          |
| P25815    | S100P      | -0.14 | -0.13 | 0.13  | -1.15 | 1.17  | 0.92  | 3.49 | 2.51  | 2.55 | 3.32 | 1.51 | 1.62 | 1.87  | 2.69  | 1.71  | 1.09  | 0.00019 | ****         |
| P22894    | MMP8       | -0.75 | -0.63 | 0.85  | 0.63  | 0.84  | -1.52 | 3.25 | 2.16  | 2.22 | 1.85 | 4.36 | 0.97 | 2.59  | -0.29 | 2.97  | 1.35  | 0.0028  | **           |
| P09238    | MMP10      | -1.14 | -0.90 | 2.02  | -1.08 | 0.90  | 1.12  | 1.74 | 2.79  | 1.70 | 3.36 | 4.76 | 3.36 | 1.90  | -0.01 | 2.50  | 0.19  | 0.014   | *            |
| P55060    | XPO2       | 1.12  | -0.33 | 0.98  | 0.13  | -0.39 | -0.13 | 4.18 | 2.37  | 2.16 | 2.52 | 4.01 | 0.70 | 0.72  | 0.52  | 3.04  | 0.69  | 0.0087  | **           |
| P05164    | PERM       | 0.24  | -0.01 | 0.67  | 0.01  | -1.97 | -0.58 | 4.40 | 2.93  | 2.13 | 2.38 | 4.62 | 0.56 | 0.86  | -0.84 | 3.02  | -0.75 | 0.021   | *            |
| P01871    | IGHM       | -0.91 | -1.28 | -0.14 | 0.50  | 0.14  | 0.82  | 0.28 | 2.17  | 1.02 | 2.89 | 2.37 | 2.95 | 1.87  | 2.83  | 1.41  | 2.41  | 0.00024 | ****         |
| O14791    | APOL1      | -1.03 | -0.50 | -0.42 | 2.08  | 0.81  | 0.42  | 1.11 | -0.37 | 2.63 | 2.66 | 1.66 | 4.89 | 4.73  | 2.60  | -0.91 | 1.95  | 0.046   | *            |
| P12724    | ECP        | 0.89  | 0.05  | -0.25 | -0.01 | 0.01  | -1.70 | 4.20 | 2.01  | 2.28 | 2.39 | 3.74 | 0.91 | 2.29  | 0.67  | 1.89  | 2.97  | 0.00031 | ****         |
| O00533    | NCHL1      | -1.19 | 0.74  | -1.11 | -0.59 | 1.48  | 0.59  | 2.15 | 2.78  | 2.47 | 2.76 | 2.22 | 2.31 | 2.89  | 2.60  | 2.19  | 2.25  | <0.0001 | ****         |
| P15169    | CBPN       | -2.06 | -0.73 | 0.10  | 3.98  | -0.10 | 1.23  | 1.98 | 1.35  | 2.49 | 2.61 | 1.86 | 4.73 | 4.42  | 2.99  | 0.00  | 2.37  | 0.029   | **           |
| P35542    | SAA4       | -1.65 | -0.42 | -0.31 | 2.11  | 0.31  | 1.41  | 1.94 | 0.66  | 2.71 | 2.72 | 1.72 | 4.62 | 4.25  | 3.44  | -0.06 | 2.27  | 0.01    | *            |
| P27169    | PON1       | -1.08 | -1.90 | 0.05  | 3.05  | -0.05 | 0.71  | 1.72 | 0.83  | 3.13 | 2.86 | 2.01 | 4.53 | 4.32  | 2.82  | -1.60 | 2.34  | 0.031   | *            |
| P05783    | K1C18      | 0.27  | -1.99 | -3.02 | 0.19  | 1.17  | -0.19 | 3.22 | 0.85  | 2.80 | 3.32 | 0.36 | 3.31 | 2.70  | 3.27  | -0.77 | 2.43  | 0.0033  | **           |
| O60814    | H2B1K      | 1.92  | -0.39 | 1.55  | 0.39  | -0.90 | -0.55 | 5.41 | 3.85  | 2.76 | 3.28 | 5.86 | 0.39 | 0.69  | 0.81  | 4.42  | 0.54  | 0.02    | *            |
| Q96FV0    | LRC46      | -1.53 | 0.48  | -0.48 | NA    | 3.23  | 1.97  | 2.41 | 3.03  | 3.90 | 3.69 | 1.88 | 3.04 | 2.39  | 3.15  | 3.53  | 3.44  | 0.0019  | **           |
| P62805    | H4         | 1.90  | -0.63 | 2.23  | 0.63  | -1.60 | -1.36 | 5.73 | 3.17  | 3.07 | 4.05 | 5.83 | 0.93 | 1.27  | 0.71  | 4.86  | 1.06  | 0.011   | *            |
| P24158    | PRTN3      | 0.15  | -0.61 | 0.95  | 0.00  | 0.00  | -0.73 | 4.10 | 2.29  | 3.18 | 3.52 | 4.29 | 1.21 | 3.14  | 0.09  | 3.60  | 0.21  | 0.0016  | **           |
| P14780    | MMP9       | 0.15  | 0.03  | -0.03 | 0.53  | -0.99 | -1.56 | 4.55 | 3.16  | 3.74 | 2.44 | 4.87 | 1.62 | 3.39  | 1.22  | 3.99  | 0.07  | 0.00034 | ****         |
| O75594    | PGRP1      | 0.06  | 1.33  | 0.27  | -0.06 | -0.29 | -0.65 | 4.70 | 4.47  | 3.29 | 2.91 | 6.09 | 1.38 | 3.76  | 0.83  | 4.55  | 0.96  | 0.00095 | ***          |
| P20700    | LMNB1      | 0.04  | 1.31  | -0.53 | 4.25  | -0.14 | -0.04 | 3.76 | 4.33  | 3.15 | 3.47 | 4.53 | 2.72 | 3.78  | 1.14  | 3.59  | 0.67  | 0.0096  | **           |
| P46439    | GSTM5      | -1.09 | -2.24 | 1.05  | -1.05 | 5.50  | 4.83  | 3.81 | 3.07  | 4.15 | 3.83 | 3.43 | 3.73 | 3.62  | 4.40  | 4.60  | 3.17  | 0.024   | *            |











eTable 2, continued

| Uniprot # | Uniprot ID | A1   | A2   | A3    | A4    | A5    | A6    | E1    | E2    | E3    | E4    | E5    | E6    | E7    | E8    | E9    | E10   | t-test | Significance |
|-----------|------------|------|------|-------|-------|-------|-------|-------|-------|-------|-------|-------|-------|-------|-------|-------|-------|--------|--------------|
| Q32MZ4    | LRRF1      | 0.68 | 0.73 | -0.55 | -0.05 | -0.16 | 0.05  | 0.19  | 0.32  | -0.77 | -0.43 | -0.84 | -0.42 | -1.59 | -0.99 | -0.37 | -1.04 | 0.025  | *            |
| O00429    | DNM1L      | 0.58 | 1.34 | -0.34 | -0.69 | 0.16  | -0.16 | -0.53 | -2.47 | -0.48 | -0.64 | -1.28 | -0.65 | -0.95 | -0.39 | 0.61  | -0.35 | 0.047  | *            |
| Q7L9L4    | MOB1B      | 0.13 | 0.46 | -0.10 | -0.26 | -0.36 | 0.10  | -0.56 | -0.65 | -0.62 | -1.14 | -0.45 | -0.59 | -0.77 | -0.42 | -0.09 | -0.04 | 0.0054 | *            |
| A0MZ66    | SHOT1      | 1.16 | 1.53 | -0.85 | -0.54 | 0.54  | -0.79 | -0.47 | -1.21 | -0.34 | -0.46 | -1.76 | -2.17 | -1.48 | -0.67 | 0.26  | -0.29 | 0.038  | *            |
| Q92882    | OSTF1      | 0.71 | 0.72 | 0.12  | -0.37 | -0.12 | -0.15 | -0.15 | -0.72 | -0.59 | -1.13 | -0.55 | -1.01 | -0.82 | -0.52 | 0.29  | -0.40 | 0.0067 | *            |
| Q9BR76    | COR1B      | 0.46 | 0.67 | -0.20 | -0.82 | 0.15  | -0.15 | -0.39 | -1.13 | -0.47 | -0.61 | -1.38 | -1.15 | -0.75 | -0.23 | -0.01 | -0.53 | 0.014  | *            |
| P61981    | I433G      | 0.66 | 0.82 | -0.25 | -0.48 | 0.01  | -0.01 | -0.50 | -0.82 | -0.50 | -0.63 | -0.76 | -0.75 | -0.80 | -0.08 | 0.16  | -0.09 | 0.014  | *            |
| Q9H0E2    | TOLIP      | 0.84 | 0.74 | 0.02  | -0.15 | -0.15 | -0.02 | -0.43 | -0.57 | -0.56 | -0.43 | -0.48 | -0.63 | -0.55 | -0.75 | 0.12  | -0.56 | 0.0011 | **           |
| O75351    | VPS4B      | 0.31 | 0.21 | -0.15 | -0.39 | 0.14  | -0.14 | -0.65 | -0.38 | -0.22 | -0.68 | -0.58 | -0.50 | -0.86 | -0.63 | 0.16  | -0.49 | 0.0048 | **           |
| Q4G0F5    | VP26B      | 1.26 | 0.41 | -0.06 | -0.21 | -0.34 | 0.06  | 0.19  | 0.08  | -0.25 | -0.18 | -1.82 | -0.68 | -1.00 | -0.55 | -2.21 | -0.53 | 0.033  | *            |
| P43034    | LIS1       | 0.51 | 0.76 | -0.24 | -0.99 | 0.24  | -0.26 | -0.79 | -0.74 | -0.43 | -0.31 | -1.13 | -0.47 | -0.59 | -0.60 | -0.16 | -0.36 | 0.026  | *            |
| P55957    | BID        | 0.92 | 0.64 | -0.42 | -0.01 | -0.22 | 0.01  | -0.76 | -1.43 | -0.27 | -0.64 | -0.47 | -0.84 | -0.06 | -0.58 | 0.32  | -0.40 | 0.02   | *            |

**eTable 3**

| <b>Ingenuity Canonical Pathways</b>                                   | <b>-log(p-value)</b> | <b>Ratio</b> | <b>z-score</b> |
|-----------------------------------------------------------------------|----------------------|--------------|----------------|
| Actin Cytoskeleton Signaling                                          | 22.8                 | 0.155        | -4.004         |
| Remodeling of Epithelial Adherens Junctions                           | 20.8                 | 0.324        | -2.828         |
| Integrin Signaling                                                    | 15.9                 | 0.136        | -3.024         |
| Signaling by Rho Family GTPases                                       | 14.9                 | 0.116        | -4.6           |
| RHO GDI Signaling                                                     | 14.9                 | 0.13         | 3.273          |
| Leukocyte Extravasation Signaling                                     | 14.2                 | 0.135        | -2.858         |
| RHOA Signaling                                                        | 13.6                 | 0.169        | -4.146         |
| Regulation of Actin-based Motility by Rho                             | 13.1                 | 0.172        | -3.153         |
| Axonal Guidance Signaling                                             | 12.7                 | 0.0771       | NaN            |
| RAC Signaling                                                         | 12.6                 | 0.152        | -3.3           |
| Clathrin-mediated Endocytosis Signaling                               | 11.5                 | 0.119        | NaN            |
| Germ Cell-Sertoli Cell Junction Signaling                             | 10.8                 | 0.123        | NaN            |
| Fcγ Receptor-mediated Phagocytosis in Macrophages and Monocytes       | 10.5                 | 0.17         | -3             |
| EIF2 Signaling                                                        | 10.2                 | 0.103        | 1.387          |
| Phagosome Maturation                                                  | 8.76                 | 0.113        | NaN            |
| Actin Nucleation by ARP-WASP Complex                                  | 8.56                 | 0.151        | -3.162         |
| Sertoli Cell-Sertoli Cell Junction Signaling                          | 8.48                 | 0.0971       | NaN            |
| VEGF Signaling                                                        | 8.2                  | 0.141        | -2.121         |
| Epithelial Adherens Junction Signaling                                | 8.01                 | 0.108        | -1.213         |
| Ephrin Receptor Signaling                                             | 7.9                  | 0.0945       | -3.638         |
| IL-8 Signaling                                                        | 7.55                 | 0.09         | -1.886         |
| Production of Nitric Oxide and Reactive Oxygen Species in Macrophages | 7.49                 | 0.0942       | 0.258          |
| Semaphorin Neuronal Repulsive Signaling Pathway                       | 7.44                 | 0.106        | 0              |
| Synaptogenesis Signaling Pathway                                      | 7.37                 | 0.0737       | -2.4           |
| FAK Signaling                                                         | 7.25                 | 0.12         | NaN            |
| UDP-N-acetyl-D-galactosamine Biosynthesis II                          | 7.14                 | 0.462        | -0.816         |
| 14-3-3-mediated Signaling                                             | 6.8                  | 0.11         | -1.89          |
| Agranulocyte Adhesion and Diapedesis                                  | 6.74                 | 0.0841       | NaN            |
| fMLP Signaling in Neutrophils                                         | 6.63                 | 0.107        | -3.464         |
| Gap Junction Signaling                                                | 6.52                 | 0.0859       | NaN            |
| Role of Tissue Factor in Cancer                                       | 6.44                 | 0.112        | NaN            |
| Virus Entry via Endocytic Pathways                                    | 6.13                 | 0.115        | NaN            |
| Paxillin Signaling                                                    | 5.95                 | 0.111        | -1.897         |
| Phagosome Formation                                                   | 5.81                 | 0.0479       | -4.004         |
| PFKFB4 Signaling Pathway                                              | 5.63                 | 0.174        | -0.707         |
| LXR/RXR Activation                                                    | 5.35                 | 0.0976       | 2.111          |
| Dilated Cardiomyopathy Signaling Pathway                              | 5.3                  | 0.089        | 0.905          |
| ILK Signaling                                                         | 5.16                 | 0.0758       | -1.941         |
| G Beta Gamma Signaling                                                | 5.14                 | 0.093        | -2.309         |
| tRNA Charging                                                         | 5.09                 | 0.179        | -2.646         |
| Regulation of eIF4 and p70S6K Signaling                               | 5.01                 | 0.0782       | NaN            |
| Caveolar-mediated Endocytosis Signaling                               | 4.88                 | 0.12         | NaN            |
| PAK Signaling                                                         | 4.76                 | 0.0932       | -2.121         |

eTable 3, continued

| <b>Ingenuity Canonical Pathways</b>                  | <b>-log(p-value)</b> | <b>Ratio</b> | <b>z-score</b> |
|------------------------------------------------------|----------------------|--------------|----------------|
| Renin-Angiotensin Signaling                          | 4.7                  | 0.0917       | -2.111         |
| Coronavirus Replication Pathway                      | 4.66                 | 0.156        | 2.646          |
| FXR/RXR Activation                                   | 4.5                  | 0.0873       | NaN            |
| Reelin Signaling in Neurons                          | 4.5                  | 0.0873       | -2.53          |
| Cardiac Hypertrophy Signaling                        | 4.38                 | 0.062        | -1.941         |
| Acute Phase Response Signaling                       | 4.21                 | 0.0703       | 0.333          |
| IL-12 Signaling and Production in Macrophages        | 4.19                 | 0.0809       | NaN            |
| ERK/MAPK Signaling                                   | 4.15                 | 0.0654       | -2.111         |
| CXCR4 Signaling                                      | 4.02                 | 0.0719       | -2.714         |
| Estrogen Receptor Signaling                          | 3.93                 | 0.0495       | -1.414         |
| Mechanisms of Viral Exit from Host Cells             | 3.91                 | 0.146        | NaN            |
| Natural Killer Cell Signaling                        | 3.89                 | 0.0653       | -1.387         |
| Cellular Effects of Sildenafil (Viagra)              | 3.84                 | 0.0738       | NaN            |
| Tight Junction Signaling                             | 3.76                 | 0.0674       | NaN            |
| Semaphorin Signaling in Neurons                      | 3.75                 | 0.113        | NaN            |
| HIF1 $\alpha$ Signaling                              | 3.7                  | 0.0625       | -1.732         |
| Atherosclerosis Signaling                            | 3.68                 | 0.0769       | NaN            |
| Thrombin Signaling                                   | 3.66                 | 0.0619       | -3             |
| Trehalose Degradation II (Trehalase)                 | 3.64                 | 0.429        | NaN            |
| Granulocyte Adhesion and Diapedesis                  | 3.52                 | 0.0635       | NaN            |
| Regulation of Cellular Mechanics by Calpain Protease | 3.51                 | 0.0899       | 0              |
| Agrin Interactions at Neuromuscular Junction         | 3.42                 | 0.1          | -1.134         |
| ERBB Signaling                                       | 3.35                 | 0.0851       | -2.121         |
| Ephrin B Signaling                                   | 3.34                 | 0.0972       | -0.816         |
| Glioma Invasiveness Signaling                        | 3.31                 | 0.0959       | -1.633         |
| Coagulation System                                   | 3.29                 | 0.143        | 1.342          |
| Colorectal Cancer Metastasis Signaling               | 3.13                 | 0.052        | -0.302         |
| Pentose Phosphate Pathway                            | 3.12                 | 0.3          | NaN            |
| GP6 Signaling Pathway                                | 3.11                 | 0.0709       | -0.707         |
| Protein Kinase A Signaling                           | 3.08                 | 0.0448       | 0.277          |
| Apoptosis Signaling                                  | 3.05                 | 0.0769       | 1.414          |
| Calcium Signaling                                    | 3                    | 0.0556       | NaN            |
| $\alpha$ -Adrenergic Signaling                       | 3                    | 0.0755       | -2.236         |
| p70S6K Signaling                                     | 2.99                 | 0.0682       | -2.449         |
| GDP-glucose Biosynthesis                             | 2.99                 | 0.273        | NaN            |
| GNRH Signaling                                       | 2.98                 | 0.0585       | -1.897         |
| CCR3 Signaling in Eosinophils                        | 2.92                 | 0.0667       | -1.633         |
| Glycolysis I                                         | 2.91                 | 0.16         | 0              |
| Gluconeogenesis I                                    | 2.91                 | 0.16         | 0              |
| PPAR $\alpha$ /RXR $\alpha$ Activation               | 2.89                 | 0.057        | 1.897          |
| Hepatic Fibrosis Signaling Pathway                   | 2.88                 | 0.043        | -2.84          |
| Apelin Adipocyte Signaling Pathway                   | 2.88                 | 0.0814       | -0.816         |
| Glucose and Glucose-1-phosphate Degradation          | 2.87                 | 0.25         | NaN            |

eTable 3, continued

| <b>Ingenuity Canonical Pathways</b>                               | <b>-log(p-value)</b> | <b>Ratio</b> | <b>z-score</b> |
|-------------------------------------------------------------------|----------------------|--------------|----------------|
| Role of MAPK Signaling in Promoting the Pathogenesis of Influenza | 2.84                 | 0.0714       | -2.828         |
| Iron homeostasis signaling pathway                                | 2.83                 | 0.0647       | NaN            |
| Amyotrophic Lateral Sclerosis Signaling                           | 2.77                 | 0.0696       | 0              |
| Fc Epsilon RI Signaling                                           | 2.7                  | 0.0678       | -2.828         |
| Airway Pathology in Chronic Obstructive Pulmonary Disease         | 2.7                  | 0.0678       | NaN            |
| Cholecystokinin/Gastrin-mediated Signaling                        | 2.68                 | 0.0672       | -2.646         |
| Pentose Phosphate Pathway (Oxidative Branch)                      | 2.67                 | 0.5          | NaN            |
| N-acetylglucosamine Degradation II                                | 2.67                 | 0.5          | NaN            |
| Role of IL-17A in Psoriasis                                       | 2.66                 | 0.214        | NaN            |
| Colanic Acid Building Blocks Biosynthesis                         | 2.66                 | 0.214        | NaN            |
| Melanocyte Development and Pigmentation Signaling                 | 2.66                 | 0.0745       | -1.134         |
| Corticotropin Releasing Hormone Signaling                         | 2.63                 | 0.0604       | -1.414         |
| Molecular Mechanisms of Cancer                                    | 2.6                  | 0.0404       | NaN            |
| Melatonin Signaling                                               | 2.59                 | 0.0833       | -1.633         |
| Amyloid Processing                                                | 2.54                 | 0.098        | NaN            |
| Apelin Cardiomyocyte Signaling Pathway                            | 2.53                 | 0.0707       | -2.646         |
| Extrinsic Prothrombin Activation Pathway                          | 2.49                 | 0.188        | NaN            |
| Macropinocytosis Signaling                                        | 2.47                 | 0.0789       | -1             |
| Airway Inflammation in Asthma                                     | 2.46                 | 0.121        | NaN            |
| CDC42 Signaling                                                   | 2.41                 | 0.0365       | -3.771         |
| IGF-1 Signaling                                                   | 2.41                 | 0.0673       | -1.342         |
| HGF Signaling                                                     | 2.4                  | 0.0606       | -1.633         |
| IL-3 Signaling                                                    | 2.39                 | 0.0759       | -0.816         |
| Chemokine Signaling                                               | 2.36                 | 0.075        | -1.633         |
| Role of PKR in Interferon Induction and Antiviral Response        | 2.32                 | 0.0588       | -1.633         |
| Urea Cycle                                                        | 2.28                 | 0.333        | NaN            |
| UDP-N-acetyl-D-glucosamine Biosynthesis II                        | 2.28                 | 0.333        | NaN            |
| Rapoport-Luebering Glycolytic Shunt                               | 2.28                 | 0.333        | NaN            |
| VEGF Family Ligand-Receptor Interactions                          | 2.26                 | 0.0714       | -2.236         |
| Gαq Signaling                                                     | 2.25                 | 0.0529       | -1.633         |
| Coronavirus Pathogenesis Pathway                                  | 2.22                 | 0.0493       | -3.162         |
| Prolactin Signaling                                               | 2.21                 | 0.0698       | -2.236         |
| Inhibition of Matrix Metalloproteases                             | 2.19                 | 0.103        | -1             |
| BMP signaling pathway                                             | 2.18                 | 0.069        | -1.633         |
| Thrombopoietin Signaling                                          | 2.15                 | 0.0794       | -2.236         |
| AMPK Signaling                                                    | 2.14                 | 0.0455       | 0.378          |
| Neuregulin Signaling                                              | 2.13                 | 0.0598       | -2.236         |
| Sphingosine-1-phosphate Signaling                                 | 2.11                 | 0.0593       | -1.342         |
| NGF Signaling                                                     | 2.11                 | 0.0593       | -2.646         |
| Intrinsic Prothrombin Activation Pathway                          | 2.08                 | 0.0952       | 2              |
| IL-1 Signaling                                                    | 2.03                 | 0.0638       | 0              |
| Endocannabinoid Developing Neuron Pathway                         | 2.02                 | 0.0569       | -2.236         |
| ERBB4 Signaling                                                   | 2.01                 | 0.0735       | -2.236         |

eTable 3, continued

| <b>Ingenuity Canonical Pathways</b>                        | <b>-log(p-value)</b> | <b>Ratio</b> | <b>z-score</b> |
|------------------------------------------------------------|----------------------|--------------|----------------|
| Role of NFAT in Cardiac Hypertrophy                        | 1.99                 | 0.0455       | -1.897         |
| Tumoricidal Function of Hepatic Natural Killer Cells       | 1.98                 | 0.125        | NaN            |
| Salvage Pathways of Pyrimidine Ribonucleotides             | 1.94                 | 0.0612       | -0.816         |
| Endothelin-1 Signaling                                     | 1.94                 | 0.0471       | -2.333         |
| Salvage Pathways of Pyrimidine Deoxyribonucleotides        | 1.92                 | 0.222        | NaN            |
| P2Y Purigenic Receptor Signaling Pathway                   | 1.91                 | 0.0543       | -1.134         |
| RAR Activation                                             | 1.87                 | 0.0459       | NaN            |
| Leptin Signaling in Obesity                                | 1.86                 | 0.0676       | NaN            |
| Gα12/13 Signaling                                          | 1.84                 | 0.0526       | -2.646         |
| Insulin Secretion Signaling Pathway                        | 1.83                 | 0.041        | -1.897         |
| Adrenomedullin signaling pathway                           | 1.83                 | 0.0452       | -2.333         |
| Osteoarthritis Pathway                                     | 1.82                 | 0.0427       | 1.342          |
| MYC Mediated Apoptosis Signaling                           | 1.82                 | 0.08         | -1             |
| UVC-Induced MAPK Signaling                                 | 1.79                 | 0.0784       | -2             |
| NRF2-mediated Oxidative Stress Response                    | 1.78                 | 0.0422       | -2             |
| Maturity Onset Diabetes of Young (MODY) Signaling          | 1.77                 | 0.0641       | NaN            |
| Gαi Signaling                                              | 1.76                 | 0.0507       | -1.342         |
| MSP-RON Signaling In Cancer Cells Pathway                  | 1.76                 | 0.0507       | -1.89          |
| Glucocorticoid Receptor Signaling                          | 1.76                 | 0.0327       | NaN            |
| Opioid Signaling Pathway                                   | 1.74                 | 0.0399       | -1.667         |
| Renal Cell Carcinoma Signaling                             | 1.73                 | 0.0625       | -1.342         |
| Melatonin Degradation III                                  | 1.72                 | 1            | NaN            |
| Glutamine Biosynthesis I                                   | 1.72                 | 1            | NaN            |
| UDP-N-acetyl-D-galactosamine Biosynthesis I                | 1.72                 | 1            | NaN            |
| PI3K Signaling in B Lymphocytes                            | 1.69                 | 0.049        | -2.236         |
| Endocannabinoid Cancer Inhibition Pathway                  | 1.69                 | 0.049        | -1.134         |
| mTOR Signaling                                             | 1.67                 | 0.0425       | -1.342         |
| Tumor Microenvironment Pathway                             | 1.65                 | 0.0447       | 0              |
| FcγRIIB Signaling in B Lymphocytes                         | 1.63                 | 0.0588       | NaN            |
| LPS-stimulated MAPK Signaling                              | 1.63                 | 0.0588       | -1.342         |
| GPCR-Mediated Nutrient Sensing in Enteroendocrine Cells    | 1.61                 | 0.0517       | -0.816         |
| PDGF Signaling                                             | 1.61                 | 0.0581       | -1.342         |
| Xenobiotic Metabolism AHR Signaling Pathway                | 1.59                 | 0.0575       | 0.447          |
| Neuroprotective Role of THOP1 in Alzheimer's Disease       | 1.58                 | 0.0508       | 0.447          |
| Inhibition of Angiogenesis by TSP1                         | 1.57                 | 0.0882       | NaN            |
| Nitric Oxide Signaling in the Cardiovascular System        | 1.57                 | 0.0504       | -0.447         |
| Endometrial Cancer Signaling                               | 1.55                 | 0.0667       | -2             |
| Leukotriene Biosynthesis                                   | 1.54                 | 0.143        | NaN            |
| Crosstalk between Dendritic Cells and Natural Killer Cells | 1.51                 | 0.0549       | NaN            |
| Necroptosis Signaling Pathway                              | 1.5                  | 0.0446       | -1.134         |
| D-myo-inositol-5-phosphate Metabolism                      | 1.49                 | 0.0417       | -0.707         |
| Superpathway of Citrulline Metabolism                      | 1.49                 | 0.133        | NaN            |
| Ovarian Cancer Signaling                                   | 1.48                 | 0.0443       | -0.816         |

eTable 3, continued

| <b>Ingenuity Canonical Pathways</b>                                             | <b>-log(p-value)</b> | <b>Ratio</b> | <b>z-score</b> |
|---------------------------------------------------------------------------------|----------------------|--------------|----------------|
| eNOS Signaling                                                                  | 1.47                 | 0.044        | -1.134         |
| Granzyme B Signaling                                                            | 1.43                 | 0.125        | NaN            |
| Adenosine Nucleotides Degradation II                                            | 1.43                 | 0.125        | NaN            |
| Death Receptor Signaling                                                        | 1.43                 | 0.0521       | -1.342         |
| Pyridoxal 5'-phosphate Salvage Pathway                                          | 1.42                 | 0.0606       | -1             |
| Palmitate Biosynthesis I (Animals)                                              | 1.42                 | 0.5          | NaN            |
| L-cysteine Degradation III                                                      | 1.42                 | 0.5          | NaN            |
| Sulfate Activation for Sulfonation                                              | 1.42                 | 0.5          | NaN            |
| Fatty Acid Biosynthesis Initiation II                                           | 1.42                 | 0.5          | NaN            |
| GDP-L-fucose Biosynthesis I (from GDP-D-mannose)                                | 1.42                 | 0.5          | NaN            |
| Synaptic Long Term Potentiation                                                 | 1.42                 | 0.0465       | -1.633         |
| Histamine Degradation                                                           | 1.39                 | 0.118        | NaN            |
| Glioblastoma Multiforme Signaling                                               | 1.33                 | 0.0409       | -2.449         |
| Oncostatin M Signaling                                                          | 1.31                 | 0.0698       | NaN            |
| B Cell Development                                                              | 1.31                 | 0.0698       | NaN            |
| ERK5 Signaling                                                                  | 1.31                 | 0.0556       | -1             |
| Netrin Signaling                                                                | 1.31                 | 0.0556       | -1             |
| Granzyme A Signaling                                                            | 1.3                  | 0.105        | NaN            |
| Purine Nucleotides Degradation II (Aerobic)                                     | 1.3                  | 0.105        | NaN            |
| GPCR-Mediated Integration of Enteroendocrine Signaling Exemplified by an L Cell | 1.29                 | 0.0548       | 1              |
| G Protein Signaling Mediated by Tubby                                           | 1.28                 | 0.0682       | NaN            |
| Insulin Receptor Signaling                                                      | 1.28                 | 0.0429       | -1.633         |
| D-myo-inositol (1,4,5,6)-Tetrakisphosphate Biosynthesis                         | 1.27                 | 0.0398       | -0.378         |
| D-myo-inositol (3,4,5,6)-tetrakisphosphate Biosynthesis                         | 1.27                 | 0.0398       | -0.378         |
| Inflammasome pathway                                                            | 1.26                 | 0.1          | NaN            |
| Ascorbate Recycling (Cytosolic)                                                 | 1.25                 | 0.333        | NaN            |
| Glycerol-3-phosphate Shuttle                                                    | 1.25                 | 0.333        | NaN            |
| Glutamate Degradation II                                                        | 1.25                 | 0.333        | NaN            |
| N-acetylglucosamine Degradation I                                               | 1.25                 | 0.333        | NaN            |
| Aspartate Biosynthesis                                                          | 1.25                 | 0.333        | NaN            |
| Xenobiotic Metabolism General Signaling Pathway                                 | 1.24                 | 0.042        | -1.633         |
| GDNF Family Ligand-Receptor Interactions                                        | 1.24                 | 0.0526       | -2             |
| TREM1 Signaling                                                                 | 1.22                 | 0.0519       | -1             |
| Angiopoietin Signaling                                                          | 1.22                 | 0.0519       | -1             |
| nNOS Signaling in Neurons                                                       | 1.21                 | 0.0638       | NaN            |
| Ephrin A Signaling                                                              | 1.21                 | 0.0638       | NaN            |
| IL-7 Signaling Pathway                                                          | 1.2                  | 0.0513       | 0              |
| Endocannabinoid Neuronal Synapse Pathway                                        | 1.19                 | 0.0408       | -1.633         |
| CDK5 Signaling                                                                  | 1.19                 | 0.0446       | -0.447         |
| Breast Cancer Regulation by Stathmin1                                           | 1.19                 | 0.0287       | -2.668         |
| FLT3 Signaling in Hematopoietic Progenitor Cells                                | 1.17                 | 0.05         | -2             |
| PTEN Signaling                                                                  | 1.16                 | 0.04         | 2              |
| Role of MAPK Signaling in the Pathogenesis of Influenza                         | 1.15                 | 0.0494       | NaN            |

eTable 3, continued

| <b>Ingenuity Canonical Pathways</b>                                                    | <b>-log(p-value)</b> | <b>Ratio</b> | <b>z-score</b> |
|----------------------------------------------------------------------------------------|----------------------|--------------|----------------|
| 3-phosphoinositide Degradation                                                         | 1.15                 | 0.0372       | -0.378         |
| Cell Cycle: G2/M DNA Damage Checkpoint Regulation                                      | 1.15                 | 0.06         | NaN            |
| Differential Regulation of Cytokine Production in Intestinal Epithelial Cells by IL-17 | 1.15                 | 0.087        | NaN            |
| Vitamin-C Transport                                                                    | 1.15                 | 0.087        | NaN            |
| Bladder Cancer Signaling                                                               | 1.14                 | 0.0431       | NaN            |
| JAK/STAT Signaling                                                                     | 1.14                 | 0.0488       | -1             |
| CD28 Signaling in T Helper Cells                                                       | 1.13                 | 0.029        | -2.138         |
| Relaxin Signaling                                                                      | 1.13                 | 0.0392       | 0              |
| Heme Degradation                                                                       | 1.13                 | 0.25         | NaN            |
| Arginine Degradation I (Arginase Pathway)                                              | 1.13                 | 0.25         | NaN            |
| Oxidized GTP and dGTP Detoxification                                                   | 1.13                 | 0.25         | NaN            |
| L-cysteine Degradation I                                                               | 1.13                 | 0.25         | NaN            |
| MSP-RON Signaling In Macrophages Pathway                                               | 1.13                 | 0.0427       | -0.447         |
| Xenobiotic Metabolism PXR Signaling Pathway                                            | 1.12                 | 0.0366       | 0.378          |
| TNFR1 Signaling                                                                        | 1.11                 | 0.0577       | NaN            |
| UVB-Induced MAPK Signaling                                                             | 1.11                 | 0.0577       | NaN            |
| FGF Signaling                                                                          | 1.11                 | 0.0476       | -1             |
| Superpathway of Inositol Phosphate Compounds                                           | 1.1                  | 0.0345       | -0.707         |
| Synaptic Long Term Depression                                                          | 1.09                 | 0.0361       | -2.646         |
| Hepatic Fibrosis / Hepatic Stellate Cell Activation                                    | 1.09                 | 0.0361       | NaN            |
| HIPPO signaling                                                                        | 1.09                 | 0.0471       | NaN            |
| Gas Signaling                                                                          | 1.08                 | 0.0413       | NaN            |
| Th1 Pathway                                                                            | 1.07                 | 0.041        | NaN            |
| IL-17A Signaling in Gastric Cells                                                      | 1.06                 | 0.0769       | NaN            |
| Primary Immunodeficiency Signaling                                                     | 1.05                 | 0.0545       | NaN            |
| EGF Signaling                                                                          | 1.05                 | 0.0545       | NaN            |
| PI3K/AKT Signaling                                                                     | 1.05                 | 0.0352       | -1.342         |
| Glioma Signaling                                                                       | 1.04                 | 0.0403       | -2.236         |
| Arsenate Detoxification I (Glutaredoxin)                                               | 1.04                 | 0.2          | NaN            |
| Creatine-phosphate Biosynthesis                                                        | 1.04                 | 0.2          | NaN            |
| Serine Biosynthesis                                                                    | 1.04                 | 0.2          | NaN            |
| CMP-N-acetylneuraminate Biosynthesis I (Eukaryotes)                                    | 1.04                 | 0.2          | NaN            |
| Myo-inositol Biosynthesis                                                              | 1.04                 | 0.2          | NaN            |
| Citrulline-Nitric Oxide Cycle                                                          | 1.04                 | 0.2          | NaN            |
| Galactose Degradation I (Leloir Pathway)                                               | 1.04                 | 0.2          | NaN            |
| Huntington's Disease Signaling                                                         | 1.03                 | 0.032        | 0.816          |
| NAD Salvage Pathway II                                                                 | 1.03                 | 0.0741       | NaN            |
| Unfolded protein response                                                              | 1.02                 | 0.0444       | NaN            |
| 3-phosphoinositide Biosynthesis                                                        | 1.02                 | 0.0347       | -0.378         |
| Ferroptosis Signaling Pathway                                                          | 1.02                 | 0.0397       | -1.342         |
| CNTF Signaling                                                                         | 1.02                 | 0.0526       | NaN            |
| Role of IL-17A in Arthritis                                                            | 1.02                 | 0.0526       | NaN            |
| MSP-RON Signaling Pathway                                                              | 1                    | 0.0517       | NaN            |



eTable 3, continued

| <b>Ingenuity Canonical Pathways</b>                              | <b>-log(p-value)</b> | <b>Ratio</b> | <b>z-score</b> |
|------------------------------------------------------------------|----------------------|--------------|----------------|
| IL-4 Signaling                                                   | 0.987                | 0.043        | NaN            |
| Sonic Hedgehog Signaling                                         | 0.975                | 0.069        | NaN            |
| Androgen Signaling                                               | 0.971                | 0.0355       | -1             |
| SPINK1 Pancreatic Cancer Pathway                                 | 0.967                | 0.05         | NaN            |
| Arginine Biosynthesis IV                                         | 0.959                | 0.167        | NaN            |
| Arginine Degradation VI (Arginase 2 Pathway)                     | 0.959                | 0.167        | NaN            |
| Pentose Phosphate Pathway (Non-oxidative Branch)                 | 0.959                | 0.167        | NaN            |
| Glycerol Degradation I                                           | 0.959                | 0.167        | NaN            |
| Selenocysteine Biosynthesis II (Archaea and Eukaryotes)          | 0.959                | 0.167        | NaN            |
| Tryptophan Degradation to 2-amino-3-carboxymuconate Semialdehyde | 0.959                | 0.167        | NaN            |
| GDP-mannose Biosynthesis                                         | 0.959                | 0.167        | NaN            |
| IL-2 Signaling                                                   | 0.951                | 0.0492       | NaN            |
| TGF- $\beta$ Signaling                                           | 0.947                | 0.0417       | -2             |
| Sperm Motility                                                   | 0.932                | 0.0315       | -1             |
| p53 Signaling                                                    | 0.924                | 0.0408       | NaN            |
| White Adipose Tissue Browning Pathway                            | 0.917                | 0.0368       | -0.447         |
| Glutathione-mediated Detoxification                              | 0.903                | 0.0625       | NaN            |
| Ethanol Degradation II                                           | 0.903                | 0.0625       | NaN            |
| Erythropoietin Signaling Pathway                                 | 0.9                  | 0.0339       | -1.633         |
| Superpathway of Serine and Glycine Biosynthesis I                | 0.896                | 0.143        | NaN            |
| Adenine and Adenosine Salvage III                                | 0.896                | 0.143        | NaN            |
| Ceramide Degradation                                             | 0.896                | 0.143        | NaN            |
| Aspartate Degradation II                                         | 0.896                | 0.143        | NaN            |
| Neuropathic Pain Signaling In Dorsal Horn Neurons                | 0.889                | 0.0396       | -1             |
| ERB2-ERBB3 Signaling                                             | 0.889                | 0.0462       | NaN            |
| Apelin Endothelial Signaling Pathway                             | 0.889                | 0.036        | -2.236         |
| Dopamine-DARPP32 Feedback in cAMP Signaling                      | 0.87                 | 0.0331       | -0.447         |
| IL-17A Signaling in Airway Cells                                 | 0.863                | 0.0448       | NaN            |
| 4-1BB Signaling in T Lymphocytes                                 | 0.86                 | 0.0588       | NaN            |
| Mouse Embryonic Stem Cell Pluripotency                           | 0.857                | 0.0385       | -2             |
| Purine Ribonucleosides Degradation to Ribose-1-phosphate         | 0.845                | 0.125        | NaN            |
| Noradrenaline and Adrenaline Degradation                         | 0.842                | 0.0571       | NaN            |
| Retinoate Biosynthesis I                                         | 0.821                | 0.0556       | NaN            |
| Interferon Signaling                                             | 0.821                | 0.0556       | NaN            |
| GM-CSF Signaling                                                 | 0.821                | 0.0429       | NaN            |
| Neuroinflammation Signaling Pathway                              | 0.815                | 0.0286       | -1.89          |
| Xenobiotic Metabolism CAR Signaling Pathway                      | 0.815                | 0.0319       | 0.816          |
| Cardiac Hypertrophy Signaling (Enhanced)                         | 0.812                | 0.026        | -2.714         |
| Growth Hormone Signaling                                         | 0.81                 | 0.0423       | NaN            |
| Complement System                                                | 0.801                | 0.0541       | NaN            |
| Sphingosine and Sphingosine-1-phosphate Metabolism               | 0.796                | 0.111        | NaN            |
| Citrulline Biosynthesis                                          | 0.796                | 0.111        | NaN            |
| Antioxidant Action of Vitamin C                                  | 0.785                | 0.036        | NaN            |

eTable 3, continued

| <b>Ingenuity Canonical Pathways</b>                                      | <b>-log(p-value)</b> | <b>Ratio</b> | <b>z-score</b> |
|--------------------------------------------------------------------------|----------------------|--------------|----------------|
| Docosahexaenoic Acid (DHA) Signaling                                     | 0.783                | 0.0526       | NaN            |
| IL-17A Signaling in Fibroblasts                                          | 0.783                | 0.0526       | NaN            |
| Neurotrophin/TRK Signaling                                               | 0.747                | 0.0395       | NaN            |
| Role of MAPK Signaling in Inhibiting the Pathogenesis of Influenza       | 0.747                | 0.0395       | NaN            |
| Antiproliferative Role of Somatostatin Receptor 2                        | 0.738                | 0.039        | NaN            |
| Aryl Hydrocarbon Receptor Signaling                                      | 0.721                | 0.0314       | NaN            |
| Xenobiotic Metabolism Signaling                                          | 0.721                | 0.0278       | NaN            |
| Purine Nucleotides De Novo Biosynthesis II                               | 0.717                | 0.0909       | NaN            |
| Inhibition of ARE-Mediated mRNA Degradation Pathway                      | 0.706                | 0.0311       | -0.447         |
| HOTAIR Regulatory Pathway                                                | 0.69                 | 0.0307       | 1.342          |
| Aldosterone Signaling in Epithelial Cells                                | 0.684                | 0.0305       | NaN            |
| NAD biosynthesis II (from tryptophan)                                    | 0.684                | 0.0833       | NaN            |
| Glycogen Degradation II                                                  | 0.684                | 0.0833       | NaN            |
| LPS/IL-1 Mediated Inhibition of RXR Function                             | 0.682                | 0.0279       | NaN            |
| Senescence Pathway                                                       | 0.674                | 0.0269       | 0.378          |
| Role of IL-17F in Allergic Inflammatory Airway Diseases                  | 0.672                | 0.0444       | NaN            |
| HMGB1 Signaling                                                          | 0.664                | 0.0299       | -2             |
| TR/RXR Activation                                                        | 0.662                | 0.0357       | NaN            |
| PEDF Signaling                                                           | 0.662                | 0.0357       | NaN            |
| Apelin Pancreas Signaling Pathway                                        | 0.658                | 0.0435       | NaN            |
| Acyl-CoA Hydrolysis                                                      | 0.654                | 0.0769       | NaN            |
| NAD Phosphorylation and Dephosphorylation                                | 0.654                | 0.0769       | NaN            |
| Guanosine Nucleotides Degradation III                                    | 0.654                | 0.0769       | NaN            |
| Pancreatic Adenocarcinoma Signaling                                      | 0.652                | 0.0317       | 0              |
| Phospholipase C Signaling                                                | 0.65                 | 0.0237       | -2.714         |
| Role of Hypercytokinemia/hyperchemokine in the Pathogenesis of Influenza | 0.642                | 0.0349       | NaN            |
| IL-6 Signaling                                                           | 0.636                | 0.0312       | -2             |
| Apelin Muscle Signaling Pathway                                          | 0.631                | 0.0417       | NaN            |
| Th1 and Th2 Activation Pathway                                           | 0.629                | 0.0291       | NaN            |
| Glycogen Degradation III                                                 | 0.625                | 0.0714       | NaN            |
| Urate Biosynthesis/Inosine 5'-phosphate Degradation                      | 0.625                | 0.0714       | NaN            |
| Phenylalanine Degradation IV (Mammalian, via Side Chain)                 | 0.625                | 0.0714       | NaN            |
| Cardiac $\beta$ -adrenergic Signaling                                    | 0.616                | 0.0287       | NaN            |
| Melanoma Signaling                                                       | 0.604                | 0.04         | NaN            |
| Choline Biosynthesis III                                                 | 0.599                | 0.0667       | NaN            |
| Acute Myeloid Leukemia Signaling                                         | 0.597                | 0.033        | NaN            |
| STAT3 Pathway                                                            | 0.585                | 0.0296       | -1             |
| Chondroitin Sulfate Degradation (Metazoa)                                | 0.575                | 0.0625       | NaN            |
| Parkinson's Signaling                                                    | 0.575                | 0.0625       | NaN            |
| Th2 Pathway                                                              | 0.572                | 0.0292       | NaN            |
| Non-Small Cell Lung Cancer Signaling                                     | 0.57                 | 0.0319       | NaN            |
| Stearate Biosynthesis I (Animals)                                        | 0.569                | 0.0377       | NaN            |
| Phototransduction Pathway                                                | 0.558                | 0.037        | NaN            |

eTable 3, continued

| <b>Ingenuity Canonical Pathways</b>                                                | <b>-log(p-value)</b> | <b>Ratio</b> | <b>z-score</b> |
|------------------------------------------------------------------------------------|----------------------|--------------|----------------|
| RAN Signaling                                                                      | 0.553                | 0.0588       | NaN            |
| Dermatan Sulfate Degradation (Metazoa)                                             | 0.553                | 0.0588       | NaN            |
| ATM Signaling                                                                      | 0.547                | 0.0309       | NaN            |
| IL-17 Signaling                                                                    | 0.539                | 0.0267       | 0.447          |
| UVA-Induced MAPK Signaling                                                         | 0.538                | 0.0306       | NaN            |
| CSDE1 Signaling Pathway                                                            | 0.536                | 0.0357       | NaN            |
| Differential Regulation of Cytokine Production in Macrophages and T Helper Cells b | 0.532                | 0.0556       | NaN            |
| CD27 Signaling in Lymphocytes                                                      | 0.526                | 0.0351       | NaN            |
| Cancer Drug Resistance By Drug Efflux                                              | 0.516                | 0.0345       | NaN            |
| Regulation Of The Epithelial Mesenchymal Transition By Growth Factors Pathway      | 0.511                | 0.026        | -1.342         |
| Sumoylation Pathway                                                                | 0.5                  | 0.0291       | NaN            |
| TEC Kinase Signaling                                                               | 0.496                | 0.0225       | -2.121         |
| Methylglyoxal Degradation III                                                      | 0.493                | 0.05         | NaN            |
| Fatty Acid $\alpha$ -oxidation                                                     | 0.493                | 0.05         | NaN            |
| Putrescine Degradation III                                                         | 0.476                | 0.0476       | NaN            |
| Endoplasmic Reticulum Stress Pathway                                               | 0.476                | 0.0476       | NaN            |
| Chronic Myeloid Leukemia Signaling                                                 | 0.472                | 0.028        | NaN            |
| Telomerase Signaling                                                               | 0.472                | 0.028        | NaN            |
| PPAR Signaling                                                                     | 0.472                | 0.028        | NaN            |
| Systemic Lupus Erythematosus In T Cell Signaling Pathway                           | 0.466                | 0.0219       | -2.138         |
| Pyrimidine Deoxyribonucleotides De Novo Biosynthesis I                             | 0.46                 | 0.0455       | NaN            |
| Role of Pattern Recognition Receptors in Recognition of Bacteria and Viruses       | 0.456                | 0.0256       | -1             |
| PXR/RXR Activation                                                                 | 0.45                 | 0.0308       | NaN            |
| Induction of Apoptosis by HIV1                                                     | 0.45                 | 0.0308       | NaN            |
| Ethanol Degradation IV                                                             | 0.445                | 0.0435       | NaN            |
| Role of PI3K/AKT Signaling in the Pathogenesis of Influenza                        | 0.442                | 0.0303       | NaN            |
| Phospholipases                                                                     | 0.442                | 0.0303       | NaN            |
| Prostate Cancer Signaling                                                          | 0.44                 | 0.0268       | NaN            |
| CD40 Signaling                                                                     | 0.434                | 0.0299       | NaN            |
| Serotonin Degradation                                                              | 0.434                | 0.0299       | NaN            |
| Eicosanoid Signaling                                                               | 0.434                | 0.0299       | NaN            |
| IL-22 Signaling                                                                    | 0.431                | 0.0417       | NaN            |
| TCA Cycle II (Eukaryotic)                                                          | 0.431                | 0.0417       | NaN            |
| Tryptophan Degradation III (Eukaryotic)                                            | 0.431                | 0.0417       | NaN            |
| Role of JAK1 and JAK3 in $\gamma$ c Cytokine Signaling                             | 0.418                | 0.029        | NaN            |
| SPINK1 General Cancer Pathway                                                      | 0.418                | 0.029        | NaN            |
| Role of JAK family kinases in IL-6-type Cytokine Signaling                         | 0.416                | 0.04         | NaN            |
| Glutathione Redox Reactions I                                                      | 0.416                | 0.04         | NaN            |
| Tryptophan Degradation X (Mammalian, via Tryptamine)                               | 0.416                | 0.04         | NaN            |
| Role of JAK1, JAK2 and TYK2 in Interferon Signaling                                | 0.403                | 0.0385       | NaN            |
| D-myo-inositol (1,4,5)-Trisphosphate Biosynthesis                                  | 0.403                | 0.0385       | NaN            |
| IL-10 Signaling                                                                    | 0.396                | 0.0278       | NaN            |
| Role of NANOG in Mammalian Embryonic Stem Cell Pluripotency                        | 0.393                | 0.025        | NaN            |

eTable 3, continued

| <b>Ingenuity Canonical Pathways</b>                         | <b>-log(p-value)</b> | <b>Ratio</b> | <b>z-score</b> |
|-------------------------------------------------------------|----------------------|--------------|----------------|
| Dopamine Degradation                                        | 0.368                | 0.0345       | NaN            |
| Role of p14/p19ARF in Tumor Suppression                     | 0.368                | 0.0345       | NaN            |
| B Cell Receptor Signaling                                   | 0.367                | 0.0207       | -1.897         |
| G-Protein Coupled Receptor Signaling                        | 0.362                | 0.0217       | NaN            |
| Dopamine Receptor Signaling                                 | 0.361                | 0.026        | NaN            |
| HER-2 Signaling in Breast Cancer                            | 0.357                | 0.022        | -2.236         |
| VDR/RXR Activation                                          | 0.355                | 0.0256       | NaN            |
| NF- $\kappa$ B Activation by Viruses                        | 0.355                | 0.0256       | NaN            |
| Toll-like Receptor Signaling                                | 0.355                | 0.0256       | NaN            |
| Thyroid Cancer Signaling                                    | 0.348                | 0.0253       | NaN            |
| GABA Receptor Signaling                                     | 0.337                | 0.0229       | NaN            |
| BAG2 Signaling Pathway                                      | 0.319                | 0.0238       | NaN            |
| Role of JAK2 in Hormone-like Cytokine Signaling             | 0.317                | 0.0294       | NaN            |
| Pyrimidine Ribonucleotides Interconversion                  | 0.317                | 0.0294       | NaN            |
| Sirtuin Signaling Pathway                                   | 0.311                | 0.0205       | 2              |
| DNA Methylation and Transcriptional Repression Signaling    | 0.308                | 0.0286       | NaN            |
| Pyrimidine Ribonucleotides De Novo Biosynthesis             | 0.299                | 0.0278       | NaN            |
| TWEAK Signaling                                             | 0.292                | 0.027        | NaN            |
| Superpathway of Methionine Degradation                      | 0.292                | 0.027        | NaN            |
| Hereditary Breast Cancer Signaling                          | 0.29                 | 0.0211       | NaN            |
| Regulation of the Epithelial-Mesenchymal Transition Pathway | 0.288                | 0.0205       | NaN            |
| Ceramide Signaling                                          | 0.287                | 0.0222       | NaN            |
| RANK Signaling in Osteoclasts                               | 0.281                | 0.022        | NaN            |
| Antigen Presentation Pathway                                | 0.276                | 0.0256       | NaN            |
| Factors Promoting Cardiogenesis in Vertebrates              | 0.256                | 0.0199       | NaN            |
| April Mediated Signaling                                    | 0.255                | 0.0238       | NaN            |
| B Cell Activating Factor Signaling                          | 0.248                | 0.0233       | NaN            |
| BER (Base Excision Repair) Pathway                          | 0.242                | 0.0227       | NaN            |
| iNOS Signaling                                              | 0.224                | 0.0213       | NaN            |
| nNOS Signaling in Skeletal Muscle Cells                     | 0.218                | 0.0208       | NaN            |
